# Supplementary material
Source: PubMed Central journal article supplement (PMC5291735)
Supplement: jciinsight-2-89798-s001.pdf [file jciinsight-2-89798-s001.pdf]

**SUPPLEMENTAL MATERIAL APPENDIX:**

FIGURE S1: RECEIVER OPERATOR CHARACTERISTIC CURVE FOR FINAL ALGORITHM APPLIED TO THE MULTICENTER VALIDATION SET ..... 2

FIGURE S2: RELAPSE AND OVERALL SURVIVAL BY DONOR TYPE ..... 3

FIGURE S3: RELAPSE AND OVERALL SURVIVAL BY HLA HISTOCOMPATIBILITY ..... 4

FIGURE S4: RELAPSE AND OVERALL SURVIVAL BY CONDITIONING REGIMEN INTENSITY ..... 5

FIGURE S5: GVHD-RELATED MORTALITY BY MAGIC RISK STRATIFICATION ..... 6

FIGURE S6: ORGAN SPECIFIC GVHD OUTCOMES BY DAY 7 RISK STRATIFICATION ..... 7

TABLE S1: PATIENT OUTCOMES BY SET ..... 8

TABLE S2: BIOMARKER MEDIAN AND RANGE BY SET ..... 9

TABLE S3: NON-RELAPSE MORTALITY AT 9 AND 12 MONTHS BY SET ..... 10

TABLE S4: UNIVARIATE ANALYSIS OF CLINICAL RISK FACTORS FOR NRM ..... 11

TABLE S5: NON-RELAPSE MORTALITY FOR RISK GROUPS STRATIFIED BY INDIVIDUAL SETS ..... 12

TABLE S6: CAUSES OF NON-RELAPSE MORTALITY BY RISK GROUP (N=1287)..... 13

TABLE S7: THREE BIOMARKER ALGORITHM AT ONSET OF GVHD..... 14

TABLE S8: COMPARISON OF ALGORITHMS WITH AND WITHOUT CLINICAL RISK FACTORS\* ..... 15

TABLE S9: MAGIC CENTERS REPRESENTED IN THE MULTICENTER VALIDATION SET ..... 16

TABLE S10: REPRESENTATIVE THRESHOLDS THAT DEFINE RISK GROUPS ..... 17

**FIGURE S1: RECEIVER OPERATOR CHARACTERISTIC CURVE FOR FINAL ALGORITHM APPLIED TO THE MULTICENTER VALIDATION SET**

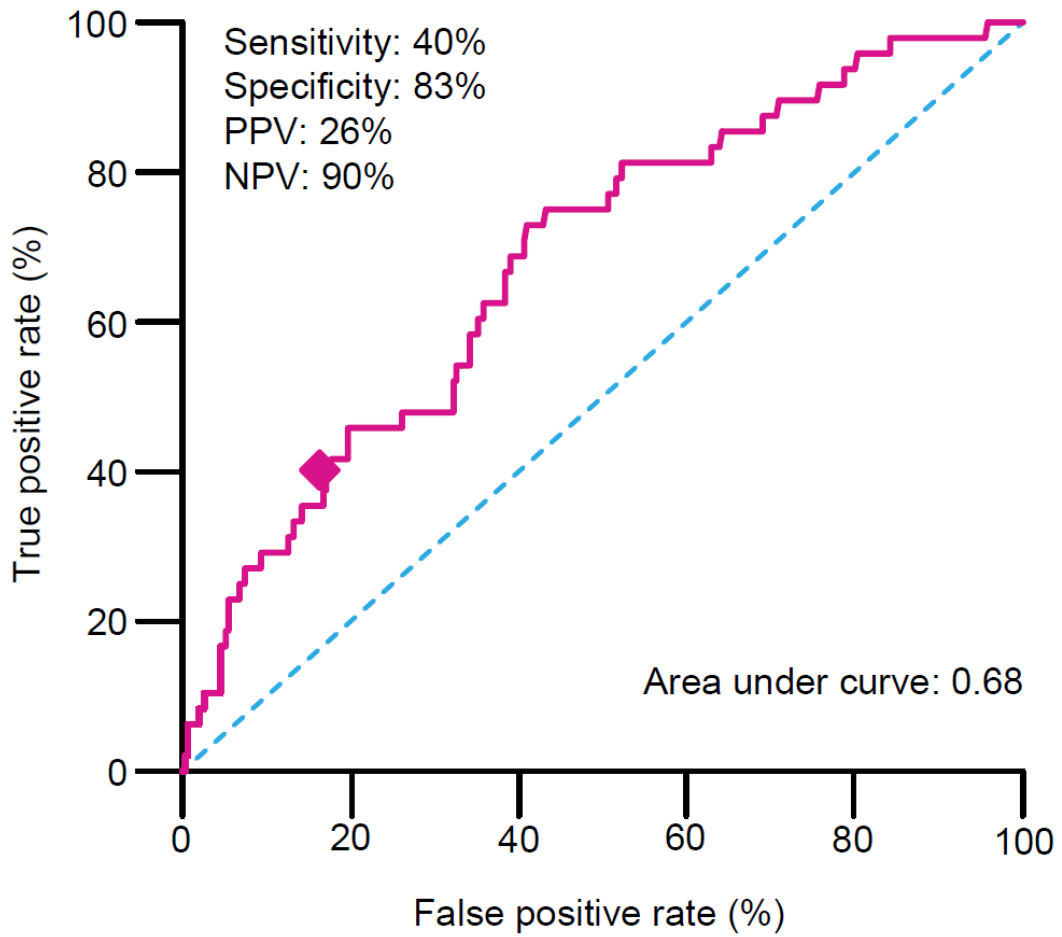

**Legend:**

Receiver operating characteristic curve for the day +7 MAGIC algorithm for prediction of 6-month non-relapse mortality. The diamond indicates the threshold that defines low versus high risk groups. PPV = positive predictive value, NPV = negative predictive value

FIGURE S2: RELAPSE AND OVERALL SURVIVAL BY DONOR TYPE

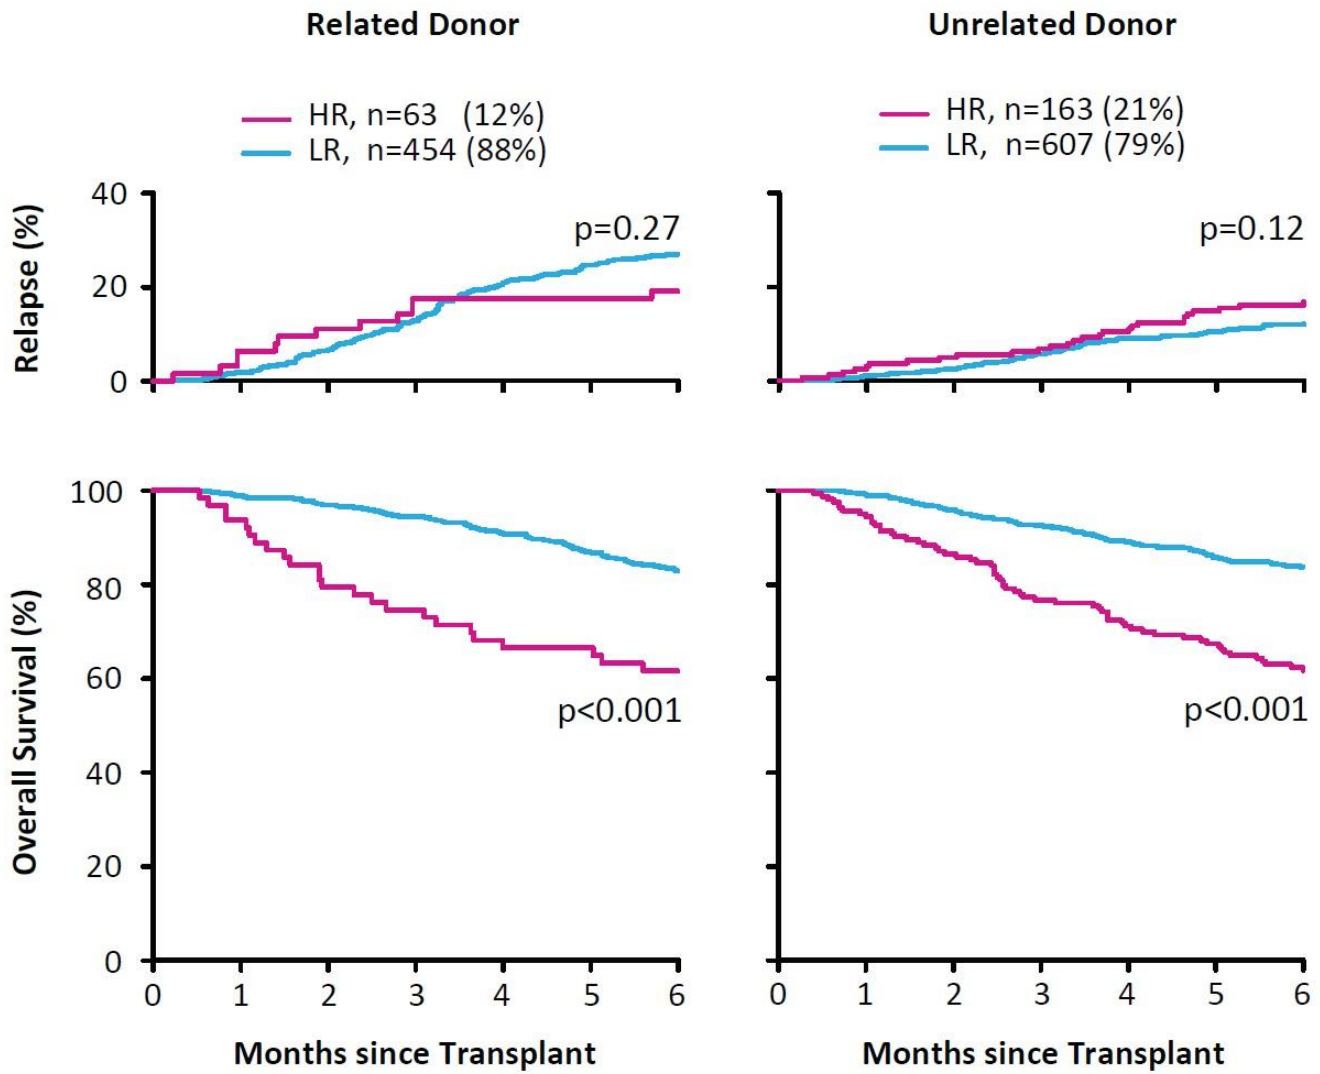

**Legend:** 6-month relapse rates for all patients (n=1287) were as follows: Related donor: High risk (HR) 19%; Low risk (LR) 27%; Unrelated donor: HR 17%; LR 13%. Gray's test was used for statistical comparisons between groups. 6-month overall survival rates were as follows: Related donor: HR 62%; LR 83%; Unrelated donor: HR 62%; LR 84%. Log-rank test was used for statistical comparisons between groups.

FIGURE S3: RELAPSE AND OVERALL SURVIVAL BY HLA HISTOCOMPATIBILITY

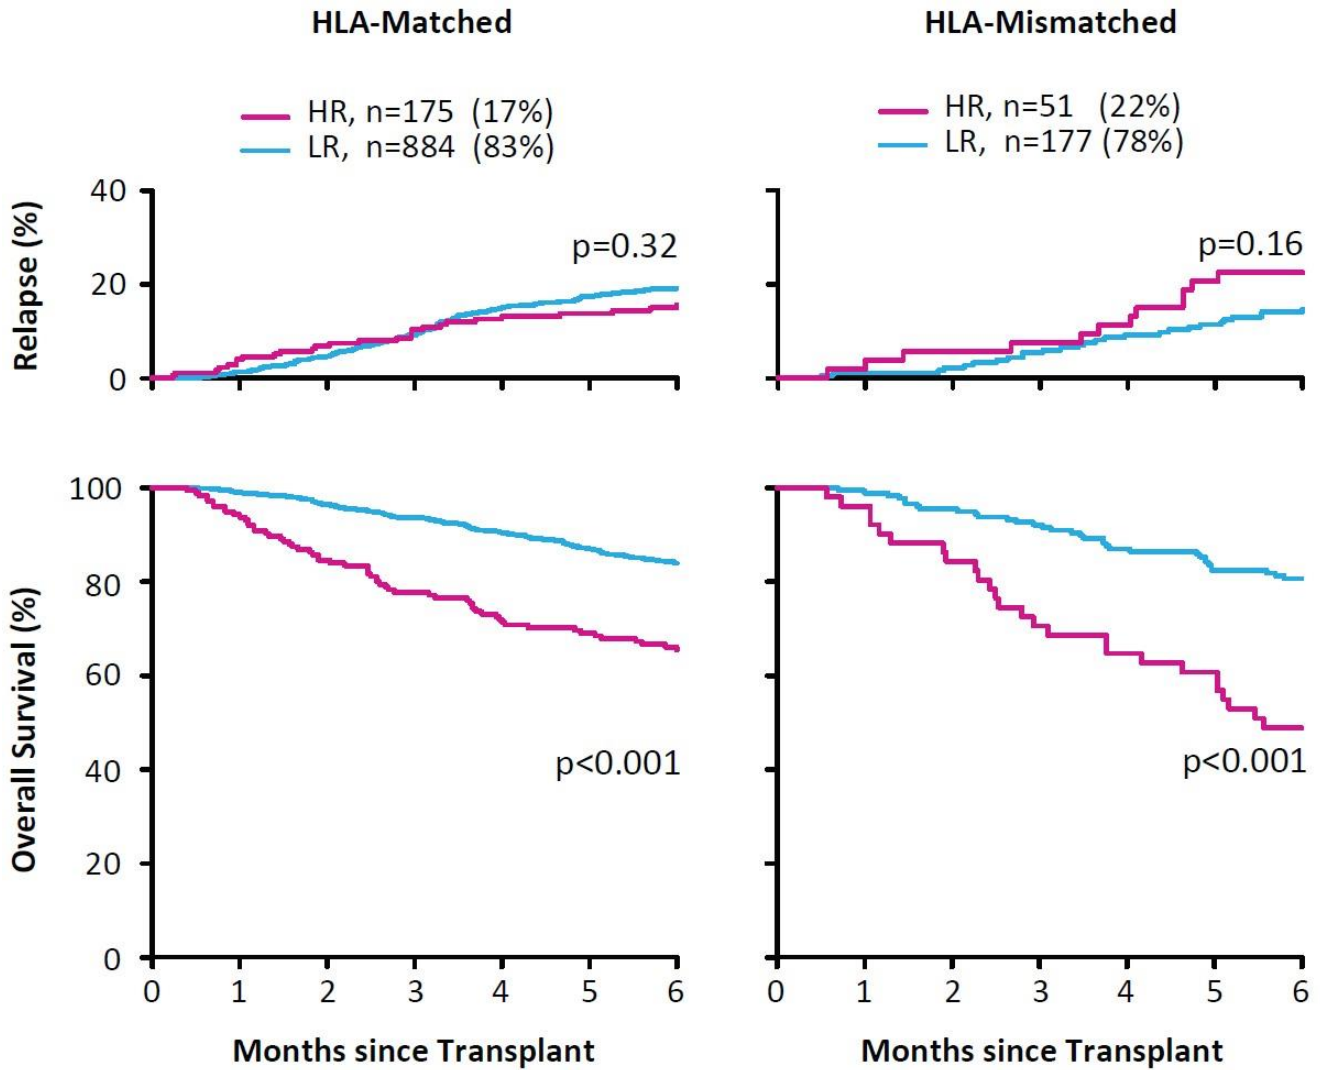

**Legend:** 6-month relapse rates for all patients (n=1287) were as follows: HLA-matched: High risk (HR) 16%; Low risk (LR) 19%; HLA- mismatched: HR 24%; LR 15%. Gray's test was used for statistical comparisons between groups. 6-month overall survival rates were as follows: HLA-matched: HR 65%; LR 84%; HLA-mismatched: HR 49%; LR 81%. Log-rank test was used for statistical comparisons between groups.

**FIGURE S4: RELAPSE AND OVERALL SURVIVAL BY CONDITIONING REGIMEN INTENSITY**

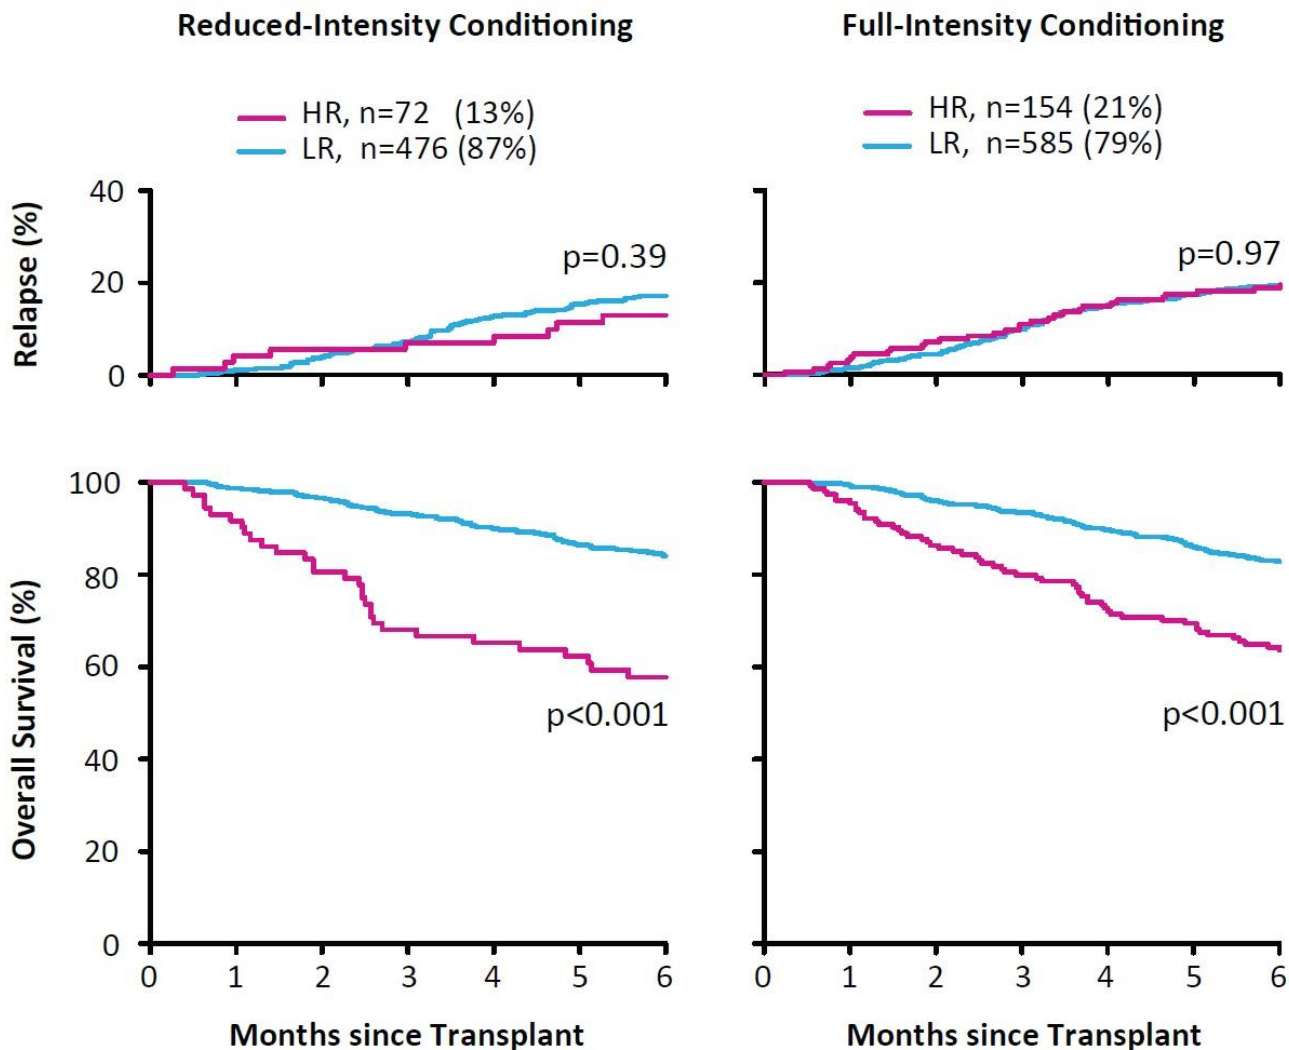

**Legend:** 6-month relapse rates for all patients (n=1287) were as follows: Reduced-intensity conditioning: High risk (HR) 13%; Low risk (LR) 17%; Full-intensity conditioning: HR 20%; LR 20%. Gray's test was used for statistical comparisons between groups. 6-month overall survival rates were as follows: Reduced-intensity conditioning: HR 58%; LR 84%; Full-intensity conditioning: HR 64%; LR 83%. Log-rank test was used for statistical comparisons between groups.

**FIGURE S5: GVHD-RELATED MORTALITY BY MAGIC RISK STRATIFICATION**

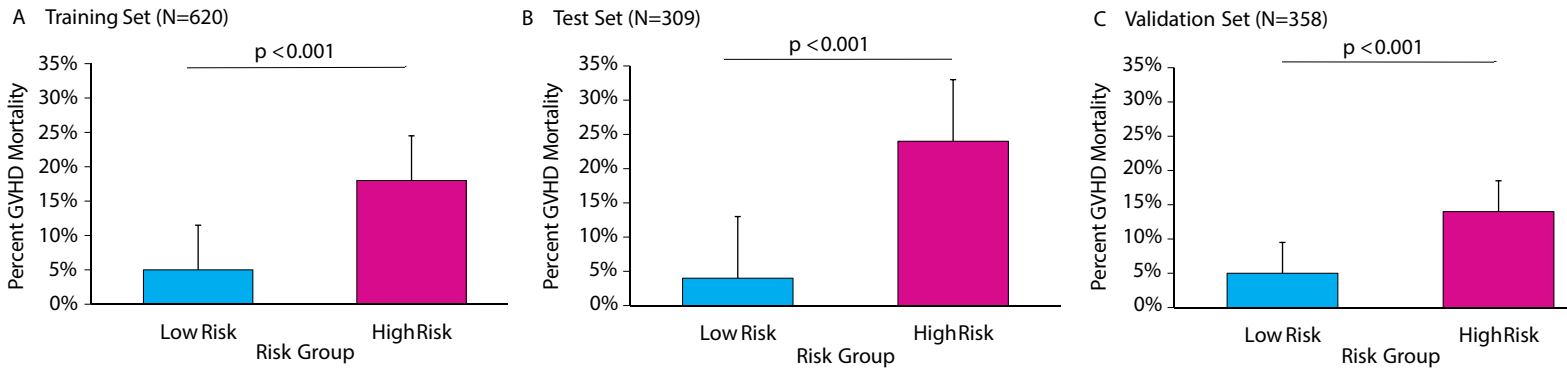

**Legend:**

Graft-vs-host disease (GVHD)-related mortality was assessed for High risk (HR) and low risk (LR) patients in each patient set. (A) Training set: HR 18% vs LR 5%,  $p < 0.001$ . (B) Test set: HR 24% vs LR 4%,  $p < 0.001$ . (C) Validation set: HR 14% vs LR 5%,  $p < 0.001$ . The chi-squared test was used to compare proportions between groups.

**FIGURE S6: ORGAN SPECIFIC GVHD OUTCOMES BY DAY 7 RISK STRATIFICATION**

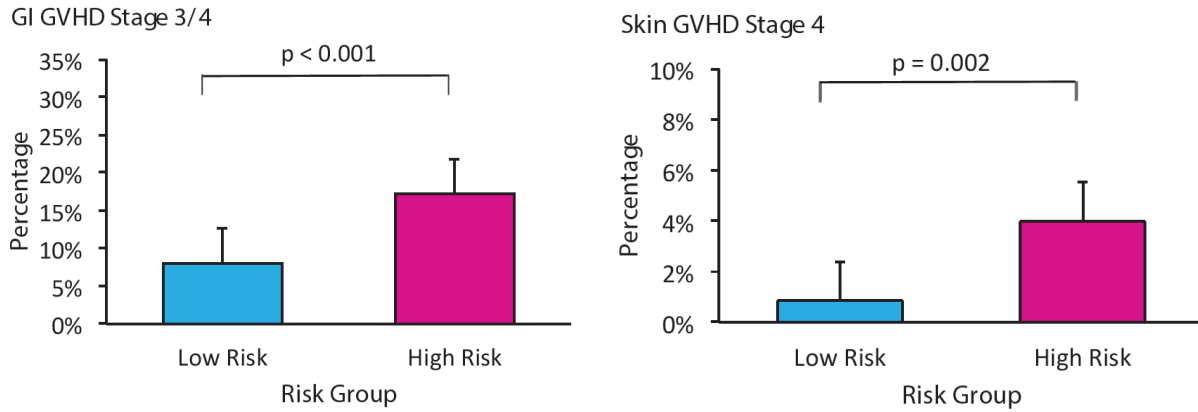

**Legend:**

Graft-vs-host disease (GVHD) outcomes were assessed for all 1287 patients according to risk group, HR (n=226) and LR (n=1061). (A) Severe gastrointestinal (GI) GVHD (Stage 3-4): HR 17% vs LR 8%,  $p < 0.001$ . (B) Severe skin GVHD (Stage 4): HR 4% vs LR 0.7%,  $p = 0.002$ . Chi-squared test was used to compare the proportions between groups.

**TABLE S1: PATIENT OUTCOMES BY SET**

| <b>Characteristic</b>                        | <b>Training set (N=620)</b> | <b>Test set (N=309)</b> | <b>Validation set (N=358)</b> |
|----------------------------------------------|-----------------------------|-------------------------|-------------------------------|
| Overall 6-month NRM - no. (%)                | 68 (11.0)                   | 37 (12.0)               | 47 (13.1)                     |
| GVHD grade at maximum - no. (%)              |                             |                         |                               |
| No GVHD                                      | 274 (44.2)                  | 133 (43.0)              | 180 (50.3)                    |
| I                                            | 113 (18.2)                  | 40 (12.9)               | 55 (15.4)                     |
| II                                           | 138 (22.3)                  | 81 (26.2)               | 70 (19.6)                     |
| III                                          | 50 (8.1)                    | 32 (10.4)               | 35 (9.8)                      |
| IV                                           | 45 (7.3)                    | 23 (7.4)                | 18 (5.0)                      |
| GVHD onset - median day (range)              | 28 (7-175)                  | 29 (8-168)              | 29 (10-177)                   |
| GVHD onset $\geq$ 14 days post HCT - no. (%) | 311 (90)                    | 158 (90)                | 166 (93)                      |



**TABLE S2: BIOMARKER MEDIAN AND RANGE BY SET**

|           | Training       |                    |                      |                         | Test           |                   |                      |                         | Validation     |                    |                      |                         |
|-----------|----------------|--------------------|----------------------|-------------------------|----------------|-------------------|----------------------|-------------------------|----------------|--------------------|----------------------|-------------------------|
|           | REG3α          | IL2Rα              | TNFR1                | ST2                     | REG3α          | IL2Rα             | TNFR1                | ST2                     | REG3α          | IL2Rα              | TNFR1                | ST2                     |
| Low Risk  | 27<br>(8-889)  | 971<br>(31-10928)  | 2594<br>(362-11602)  | 15266<br>(1495-72815)   | 24<br>(8-658)  | 938<br>(31-6092)  | 2599<br>(222-8716)   | 15979<br>(1771-73669)   | 24<br>(8-458)  | 957<br>(31-8303)   | 2175<br>(679-12226)  | 16972<br>(2977-74233)   |
| High Risk | 85<br>(8-2111) | 2418<br>(31-12745) | 5011<br>(1078-19708) | 81684<br>(22246-177566) | 96<br>(8-5072) | 2279<br>(31-9486) | 4742<br>(2152-25691) | 76792<br>(21062-172851) | 98<br>(8-1141) | 2315<br>(571-9155) | 4615<br>(2234-16886) | 64709<br>(24069-199143) |

**TABLE S3: NON-RELAPSE MORTALITY AT 9 AND 12 MONTHS BY SET**

|                 | <b>Training</b> | <b>Test</b> | <b>Validation</b> |
|-----------------|-----------------|-------------|-------------------|
| <b>9-month</b>  |                 |             |                   |
| <b>HR</b>       | 0.34            | 0.35        | 0.31              |
| <b>LR</b>       | 0.10            | 0.09        | 0.15              |
| <b>12-month</b> |                 |             |                   |
| <b>HR</b>       | 0.39            | 0.39        | 0.31              |
| <b>LR</b>       | 0.11            | 0.12        | 0.19              |

**TABLE S4: UNIVARIATE ANALYSIS OF CLINICAL RISK FACTORS FOR NRM**

| Variable                          | Training Set (n=620)     |         |
|-----------------------------------|--------------------------|---------|
|                                   | Hazard Ratio<br>(95% CI) | p-value |
| Donor: unrelated vs. related      | 3.07 (1.65-5.73)         | <0.001  |
| HLA match: matched vs. mismatched | 1.89 (1.10-3.25)         | 0.02    |
| Conditioning: reduced vs. full    | 0.78 (0.47-1.29)         | 0.34    |
| Age†                              | 1.12 (0.93-1.35)         | 0.24    |

† Reflects 10-year increases in age

**TABLE S5: NON-RELAPSE MORTALITY FOR RISK GROUPS STRATIFIED BY INDIVIDUAL SETS**

|                               | MAGIC Risk Group | Training Set (N=620) |                 |            |         | Test Set (N=309) |                 |            |         | Validation Set (N=358) |                 |            |         |
|-------------------------------|------------------|----------------------|-----------------|------------|---------|------------------|-----------------|------------|---------|------------------------|-----------------|------------|---------|
|                               |                  | Sample Size          | 6-Month NRM (%) | 95% CI (%) | p-value | Sample Size      | 6-Month NRM (%) | 95% CI (%) | p-value | Sample Size            | 6-Month NRM (%) | 95% CI (%) | p-value |
| <b>Donor Type</b>             |                  |                      |                 |            |         |                  |                 |            |         |                        |                 |            |         |
| Related                       | Low              | 217                  | 3               | 1-6        | p<0.001 | 112              | 4               | 1-8        | p<0.001 | 125                    | 10              | 5-16       | p=0.013 |
|                               | High             | 29                   | 18              | 6-34       |         | 17               | 35              | 14-58      |         | 17                     | 29              | 10-52      |         |
| Unrelated                     | Low              | 303                  | 10              | 7-14       | p<0.001 | 143              | 11              | 6-16       | p=0.001 | 161                    | 11              | 6-16       | p=0.006 |
|                               | High             | 71                   | 33              | 22-44      |         | 37               | 32              | 18-48      |         | 55                     | 26              | 15-38      |         |
| <b>HLA</b>                    |                  |                      |                 |            |         |                  |                 |            |         |                        |                 |            |         |
| Matched                       | Low              | 431                  | 6               | 4-9        | p<0.001 | 219              | 6               | 4-10       | p<0.001 | 234                    | 9               | 6-14       | p=0.004 |
|                               | High             | 82                   | 26              | 17-36      |         | 37               | 30              | 16-45      |         | 56                     | 23              | 13-35      |         |
| Mismatched                    | Low              | 89                   | 12              | 7-20       | p=0.005 | 36               | 14              | 5-27       | p=0.036 | 52                     | 13              | 6-24       | p=0.026 |
|                               | High             | 18                   | 39              | 16-61      |         | 17               | 41              | 18-64      |         | 16                     | 38              | 15-61      |         |
| <b>Conditioning Intensity</b> |                  |                      |                 |            |         |                  |                 |            |         |                        |                 |            |         |
| Reduced                       | Low              | 234                  | 6               | 3-10       | p<0.001 | 120              | 11              | 6-17       | p=0.001 | 122                    | 11              | 6-17       | p=0.001 |
|                               | High             | 30                   | 35              | 18-53      |         | 16               | 44              | 19-67      |         | 26                     | 35              | 17-53      |         |
| Full                          | Low              | 286                  | 8               | 5-12       | p<0.001 | 135              | 4               | 2-9        | p<0.001 | 164                    | 10              | 6-15       | p=0.028 |
|                               | High             | 70                   | 26              | 16-36      |         | 38               | 29              | 15-44      |         | 46                     | 22              | 11-35      |         |
| <b>Age</b>                    |                  |                      |                 |            |         |                  |                 |            |         |                        |                 |            |         |
| ≤ 21                          | Low              | 62                   | 5               | 1-12       | p<0.001 | 23               | 9               | 1-25       | p=0.470 | 33                     | 6               | 1-18       | N/A     |
|                               | High             | 7                    | 57              | 13-86      |         | 12               | 17              | 2-43       |         | 3                      | N/A             | N/A        |         |
| > 21                          | Low              | 458                  | 7               | 5-10       | p<0.001 | 232              | 7               | 4-11       | p<0.001 | 253                    | 11              | 7-15       | p<0.001 |
|                               | High             | 93                   | 26              | 18-36      |         | 42               | 38              | 23-53      |         | 69                     | 28              | 18-38      |         |

**TABLE S6: CAUSES OF NON-RELAPSE MORTALITY BY RISK GROUP (N=1287)**

| Cause – no. (%)             | Low Risk<br>(N = 1061) | High Risk<br>(N = 226) |
|-----------------------------|------------------------|------------------------|
| Acute GVHD                  | 47 (4.43)              | 41 (18.14)             |
| Chronic GVHD                | 3 (0.28)               | 2 (0.88)               |
| Infection unrelated to GVHD | 15 (1.41)              | 7 (3.10)               |
| Graft failure               | 2 (0.19)               | 2 (0.88)               |
| Pulmonary events*           | 10 (0.94)              | 3 (1.33)               |
| Cardiac events              | 2 (0.19)               | 2 (0.88)               |
| Neurologic events           | 1 (0.09)               | 3 (1.33)               |
| New malignancy**            | 3 (0.28)               | 0                      |
| VOD/SOS                     | 0                      | 2 (0.88)               |
| Other                       | 0                      | 2 (0.88)               |
| Total                       | 83 (7.82)              | 64 (28.32)             |

\* Includes diffuse alveolar hemorrhage, idiopathic pneumonia syndrome, and respiratory failure not otherwise specified

\*\* Includes 2 post-transplant lymphoproliferative disorder, 1 metastatic gastric adenocarcinoma

**TABLE S7: THREE BIOMARKER ALGORITHM AT ONSET OF GVHD**

| Ann Arbor Score | Three biomarker Algorithm (Original) |             | Three biomarker Algorithm (Re-derived) |             |
|-----------------|--------------------------------------|-------------|----------------------------------------|-------------|
|                 | N (%)<br>(Total N=328)               | 6-month NRM | N (%)<br>(Total N=589)                 | 6-month NRM |
| AA1             | 131 (40%)                            | 9%          | 85 (14%)                               | 7%          |
| AA2             | 119 (36%)                            | 28%         | 388 (66%)                              | 18%         |
| AA3             | 78 (24%)                             | 47%         | 116 (20%)                              | 45%         |

The ELISA test for ST2 (R&D Systems, Minneapolis, MN) used to derive the original three biomarker algorithm was discontinued and was no longer available for use in this study. We used the new ELISA test (R&D Systems, Minneapolis, MN) to measure all ST2 concentrations in this study. We re-derived the original algorithm to predict 6-month non-relapse mortality (NRM) using samples from 589 patients taken at the onset of GVHD symptoms. We employed an identical approach, fitting a competing risks regression model that used log-transformed concentrations of all three biomarkers [ST2, Reg3 $\alpha$  and TNFR1] and which produced the following algorithm:

$$\log[-\log(1-p)] = -10.925 + 0.642 (\log_{10}TNFR1) + 0.845 (\log_{10}Reg3\alpha) + 1.182 (\log_{10}ST2)$$

Using this algorithm we computed a predicted probability,  $p$ , of non-relapse mortality within 6 months for each patient. We then rank ordered  $p$  and identified two thresholds (0.08 and 0.32) so that the 6-month NRM of the low risk (Ann Arbor 1) and high risk (Ann Arbor 3) groups were similar to the 6-month NRM of the original Ann Arbor groups, but without consideration of the proportion of patient in each group, since that was not a consideration in generating the original algorithm. This table shows the NRM and proportion of patients for each Ann Arbor (AA) score as originally published and the re-derived three biomarker algorithm.

**TABLE S8: COMPARISON OF ALGORITHMS WITH AND WITHOUT CLINICAL RISK FACTORS\***

|                                          | MAGIC Risk Group | A. Training set (N=620) |             |       |         | B. Test set (N=309) |             |       |         | C. Validation set (N=358) |             |       |         |
|------------------------------------------|------------------|-------------------------|-------------|-------|---------|---------------------|-------------|-------|---------|---------------------------|-------------|-------|---------|
|                                          |                  | Proportion              | 6-month NRM | Δ NRM | p-value | Proportion          | 6-month NRM | Δ NRM | p-value | Proportion                | 6-month NRM | Δ NRM | p-value |
| Biomarkers without clinical risk factors | High             | 16%                     | 28%         | 21%   | <0.001  | 17%                 | 33%         | 26%   | <0.001  | 20%                       | 26%         | 16%   | <0.001  |
|                                          | Low              | 84%                     | 7%          |       |         | 83%                 | 7%          |       |         | 80%                       | 10%         |       |         |
| Biomarkers with clinical risk factors    | High             | 19%                     | 30%         | 24%   | <0.001  | 16%                 | 26%         | 21%   | <0.001  | 24%                       | 24%         | 14%   | <0.001  |
|                                          | Low              | 81%                     | 6%          |       |         | 82%                 | 7%          |       |         | 76%                       | 10%         |       |         |

\*Clinical risk factors included based on univariate analyses (Table S3) were donor type and HLA-match

**TABLE S9: MAGIC CENTERS REPRESENTED IN THE MULTICENTER VALIDATION SET**

| <b>SET</b>                   | <b>CENTER</b>                                  | <b>LOCATION</b>            | <b>SAMPLES</b> |
|------------------------------|------------------------------------------------|----------------------------|----------------|
| <b>Training</b><br>(N=620)   | University of Michigan                         | Ann Arbor, Michigan        | 428            |
|                              | University of Regensburg                       | Regensburg, Germany        | 192            |
| <b>Test</b><br>(N=309)       | University of Michigan                         | Ann Arbor, Michigan        | 214            |
|                              | University of Regensburg                       | Regensburg, Germany        | 95             |
| <b>Validation</b><br>(N=358) | Mayo Clinic                                    | Rochester, Minnesota       | 100            |
|                              | University of Hamburg                          | Hamburg, Germany           | 90             |
|                              | Ohio State University                          | Columbus, Ohio             | 47             |
|                              | University of Pennsylvania                     | Philadelphia, Pennsylvania | 29             |
|                              | King Chulalongkorn Memorial Hospital - Bangkok | Bangkok, Thailand          | 27             |
|                              | Emory University                               | Atlanta, Georgia           | 21             |
|                              | Icahn School of Medicine at Mount Sinai        | New York, New York         | 18             |
|                              | University of Würzburg                         | Würzburg, Germany          | 14             |
|                              | University Hospital Carl Gustav Carus Dresden  | Dresden, Germany           | 12             |



**TABLE S10: REPRESENTATIVE THRESHOLDS THAT DEFINE RISK GROUPS**

| Thresholds | MAGIC Risk Group | A. Training set (N=620) |             |              |         | B. Test set (N=309) |             |              |         | C. Validation Set (N=358) |             |              |         |
|------------|------------------|-------------------------|-------------|--------------|---------|---------------------|-------------|--------------|---------|---------------------------|-------------|--------------|---------|
|            |                  | Proportion              | 6-month NRM | $\Delta$ NRM | p-value | Proportion          | 6-month NRM | $\Delta$ NRM | p-value | Proportion                | 6-month NRM | $\Delta$ NRM | p-value |
| 0.14       | High             | 21%                     | 24%         | 17%          | <0.001  | 22%                 | 27%         | 19%          | <0.001  | 25%                       | 24%         | 14%          | <0.001  |
|            | Low              | 79%                     | 7%          |              |         | 78%                 | 8%          |              |         | 75%                       | 10%         |              |         |
| 0.15       | High             | 19%                     | 26%         | 19%          | <0.001  | 19%                 | 30%         | 22%          | <0.001  | 24%                       | 26%         | 16%          | <0.001  |
|            | Low              | 81%                     | 7%          |              |         | 81%                 | 8%          |              |         | 76%                       | 10%         |              |         |
| 0.16       | High             | 16%                     | 28%         | 21%          | <0.001  | 17%                 | 33%         | 26%          | <0.001  | 20%                       | 26%         | 16%          | <0.001  |
|            | Low              | 84%                     | 7%          |              |         | 83%                 | 7%          |              |         | 80%                       | 10%         |              |         |
| 0.17       | High             | 15%                     | 29%         | 22%          | <0.001  | 15%                 | 33%         | 25%          | <0.001  | 19%                       | 25%         | 14%          | <0.001  |
|            | Low              | 85%                     | 7%          |              |         | 85%                 | 8%          |              |         | 81%                       | 11%         |              |         |
| 0.18       | High             | 14%                     | 28%         | 20%          | <0.001  | 14%                 | 33%         | 24%          | <0.001  | 16%                       | 27%         | 16%          | <0.001  |
|            | Low              | 86%                     | 8%          |              |         | 86%                 | 9%          |              |         | 84%                       | 11%         |              |         |
